# Supplementary material for: Interfacing with silica boosts the catalysis of copper
Source: PubMed Central journal article supplement (PMC6105597; doi:10.1038/s41467-018-05757-6), 2018-08-22
Supplement: 41467_2018_5757_MOESM1_ESM.pdf [file 41467_2018_5757_MOESM1_ESM.pdf]

## Supplementary Materials for

### **Interfacing with Silica Boosts the Catalysis of Copper**

Chaofa Xu,<sup>1,+</sup> Guangxu Chen,<sup>1,+</sup> Yun Zhao,<sup>1</sup> Pengxin Liu,<sup>1</sup> Xinping Duan,<sup>1</sup>

Lin Gu,<sup>2</sup> Gang Fu,<sup>1,\*</sup> Youzhu Yuan,<sup>1,\*</sup> and Nanfeng Zheng<sup>1,\*</sup>

1. State Key Laboratory for Physical Chemistry of Solid Surfaces, Collaborative Innovation Center of Chemistry for Energy Materials, and National Engineering Laboratory for Green Chemical Productions of Alcohols–Ethers–Esters, College of Chemistry and Chemical Engineering, Xiamen University, Xiamen 361005, China

2. Institute of Physics, Chinese Academy of Sciences, Beijing 100190, China

<sup>+</sup> These authors contributed equally to this work.

<sup>\*</sup> Corresponding authors. E-mail: nfzheng@xmu.edu.cn (N. F. Zheng);

gfu@xmu.edu.cn (G. Fu); yzyuan@xmu.edu.cn (Y. Z. Yuan)

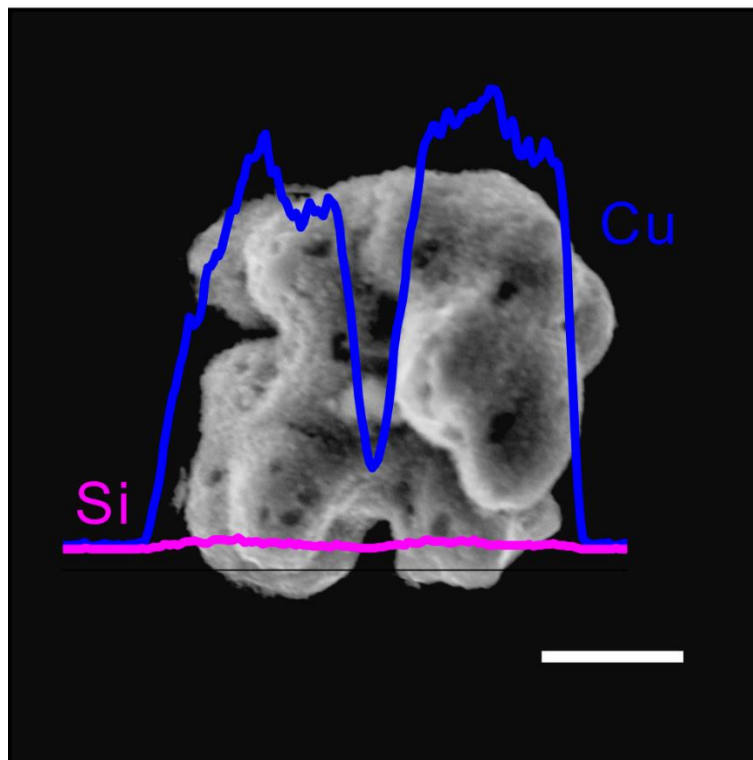

**Supplementary Figure 1.** SEM image and EDS line profile of Cu MP@m-SiO<sub>2</sub>. Scale bar is 2 $\mu$ m for the image.

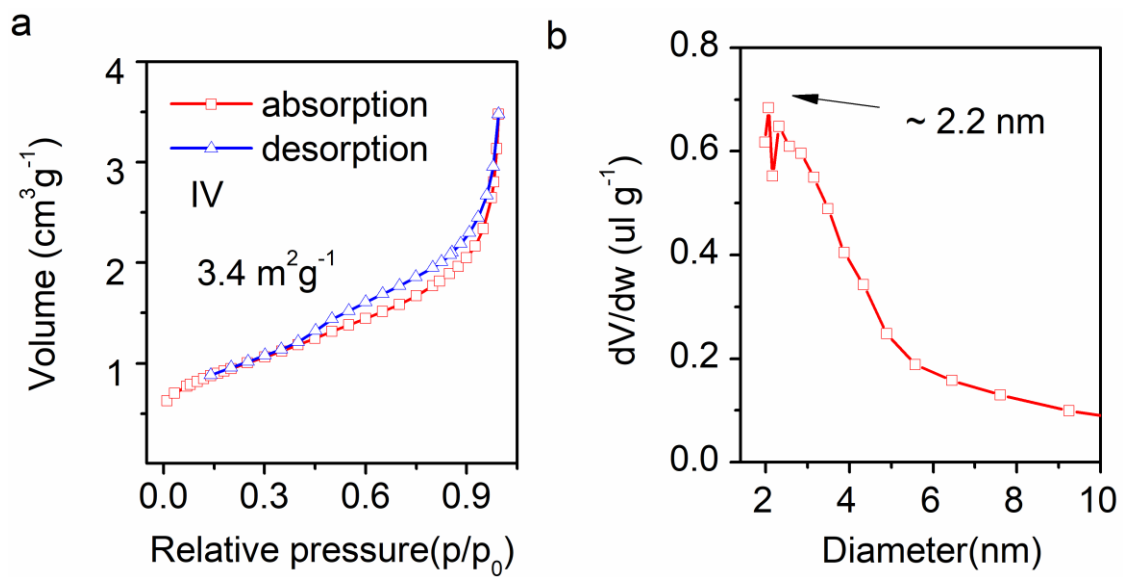

**Supplementary Figure 2.** Porosity measurements of Cu MP@m-SiO<sub>2</sub>. **a**, N<sub>2</sub> adsorption/desorption isotherm; **b**, the pore-size distribution curve obtained from the desorption data of Cu MP@m-SiO<sub>2</sub>.

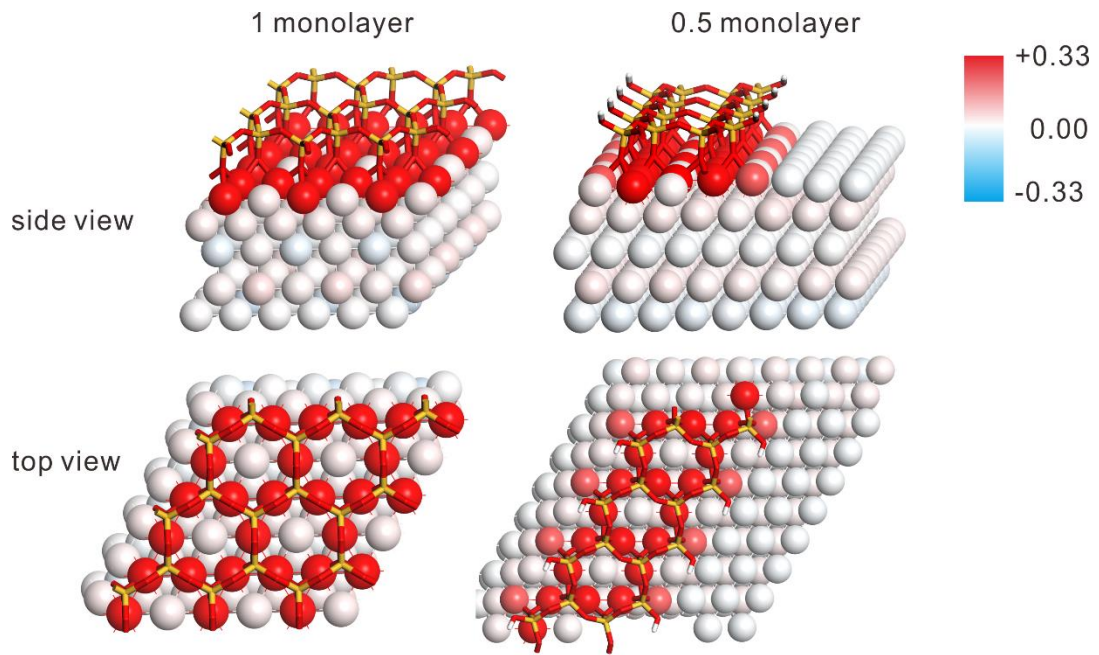

**Supplementary Figure 3.** The structural models of periodic Cu (111) with SiO<sub>2</sub> coating and Bader charge analysis of surface Cu atoms.

$$\Delta E_{\text{bind}} = [E(\text{Cu (111) /SiO}_2) - 2/3E(\text{SiO}_2_{\text{quartz}}) - 1/2E(\text{O}_2) - E(\text{Cu (111)})] / 2 = -0.66 \text{ eV}$$

Si<sup>-1</sup>

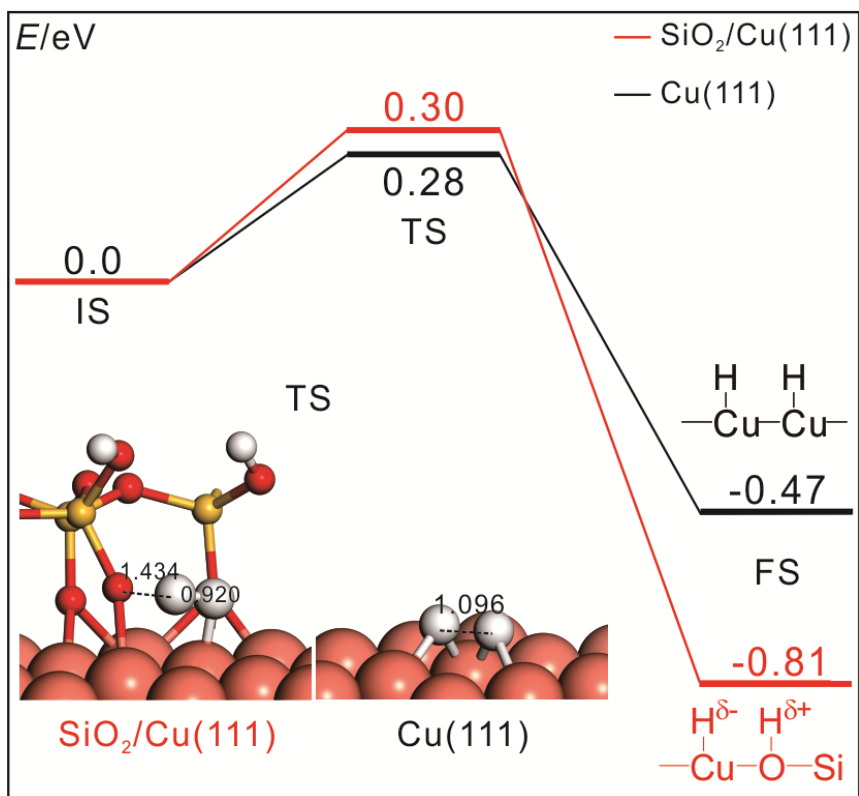

**Supplementary Figure 4.** The dissociation of H<sub>2</sub> on the surfaces of Cu(111) and SiO<sub>2</sub>/Cu(111).

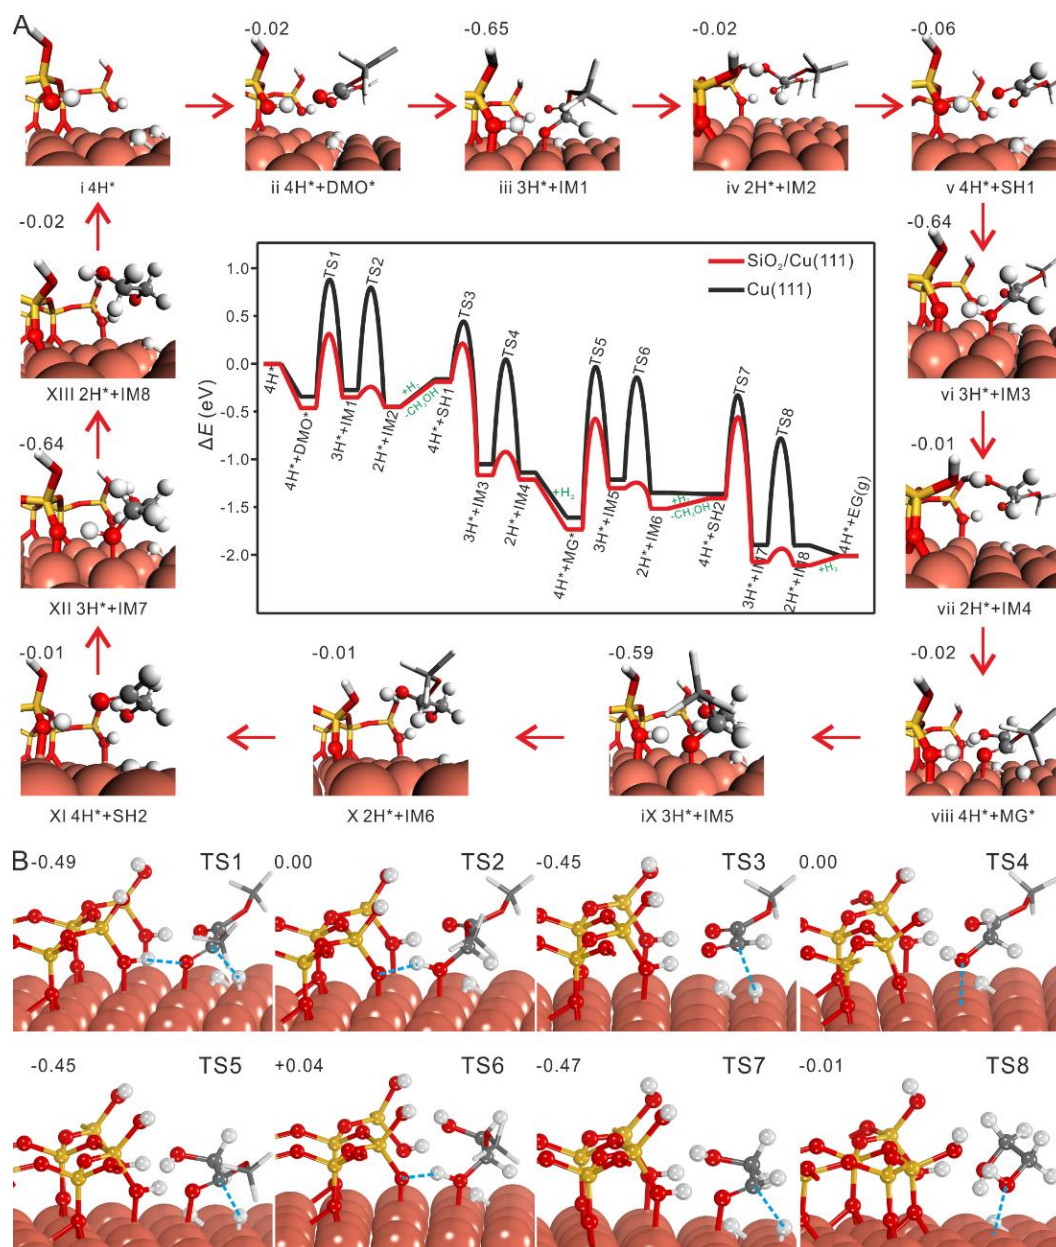

**Supplementary Figure 5.** Mechanism on how the Cu-O-SiO<sub>x</sub> interface promotes DMO hydrogenation. **a**, The DMO hydrogenation pathway on Cu(111) and SiO<sub>2</sub>/Cu(111); **b**, The optimized structures of transition states (TS) and important intermediates (IMs) of SiO<sub>2</sub>/Cu(111). The number listed in the upper right corner was the Bader charge of reactant or hydrogenated intermediate.

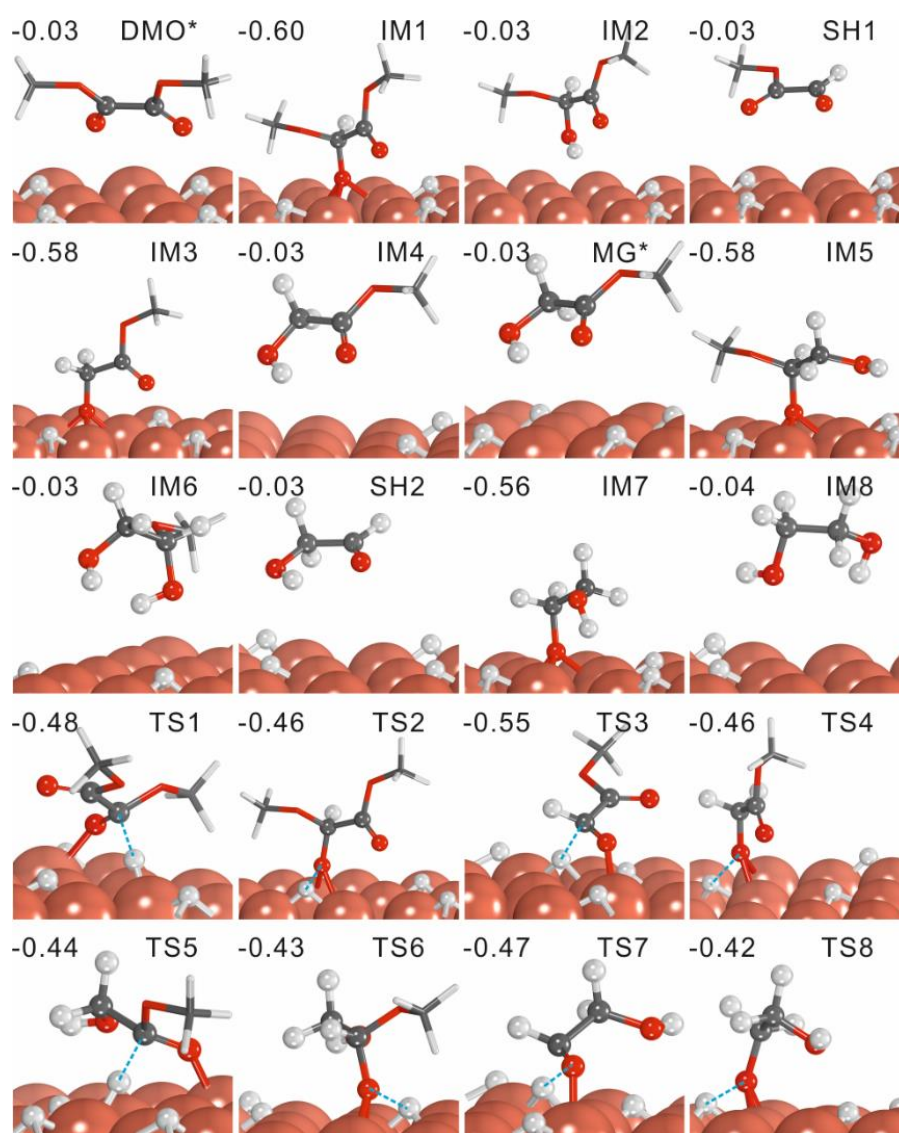

**Supplementary Figure 6.** The optimized structures of transition states (TS) and important intermediates (IMs) of Cu(111). The number listed in the upper right corner was the Bader charge of reactant or hydrogenated intermediate.

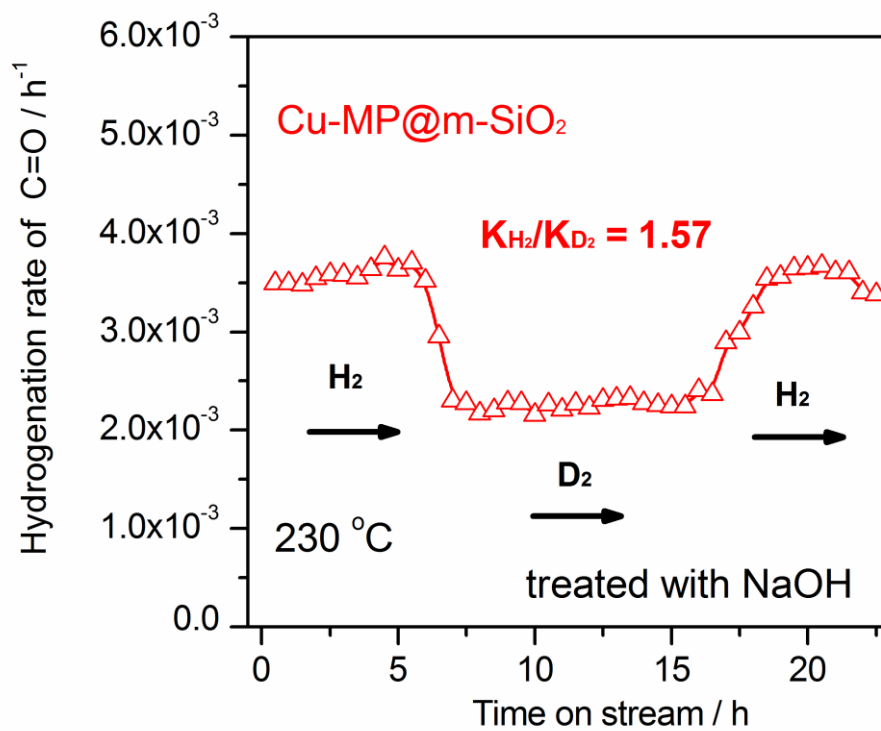

**Supplementary Figure 7.** The kinetic isotope effect of  $\text{Cu-MPs@m-SiO}_2$  catalyst after treating with NaOH (0.1M). Reaction conditions were as follows:  $\text{H}_2 / \text{DMO} = 80$  mol/mol,  $P(\text{H}_2) = 3.0 \text{ MPa}$ ,  $T = 230^\circ\text{C}$ .



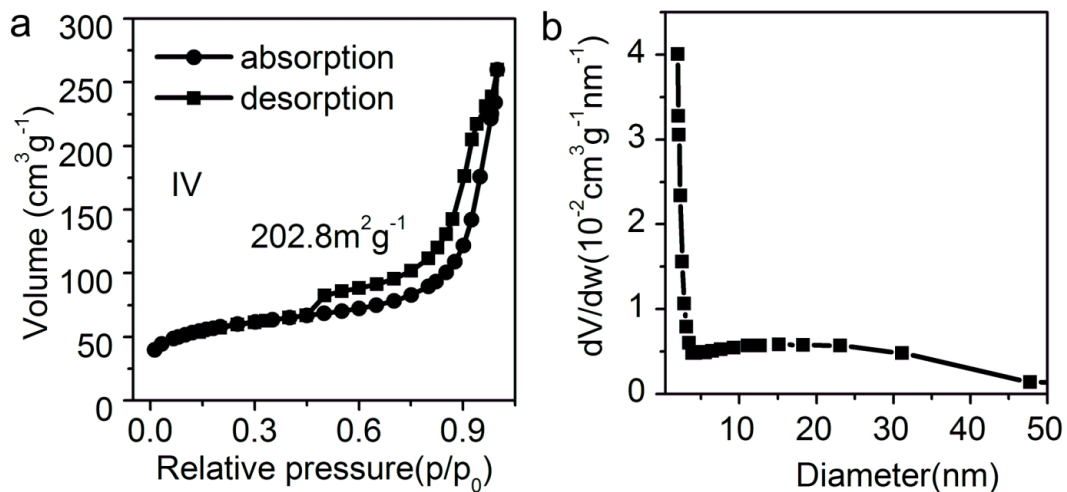

**Supplementary Figure 8.** Porosity measurements of  $\text{Cu}_2\text{O}@m\text{-SiO}_2$ . **a**,  $\text{N}_2$  adsorption/desorption isotherm; **b**, the pore-size distribution curve obtained from the desorption data of  $\text{Cu}_2\text{O}@m\text{-SiO}_2$ ; Pore size distribution was calculated from the desorption branch by the Barrett-Joyner-Halenda (BJH) method.

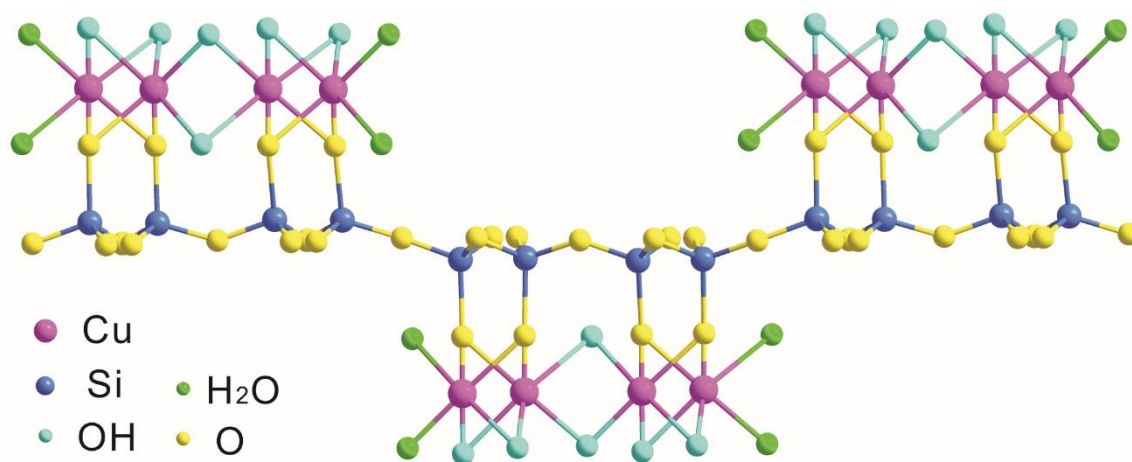

**Supplementary Figure 9.** Schematic representation of the structure of bulk copper phyllosilicate. Copper phyllosilicate ( $\text{Cu}_{2-x}\text{Si}_2\text{O}_5(\text{OH})_3 \cdot x\text{H}_2\text{O}$ ), also called chrysocolla, consists of alternate layer of  $\text{SiO}_4$  tetrahedra and discontinuous layers of  $\text{CuO}_6$  octahedra.

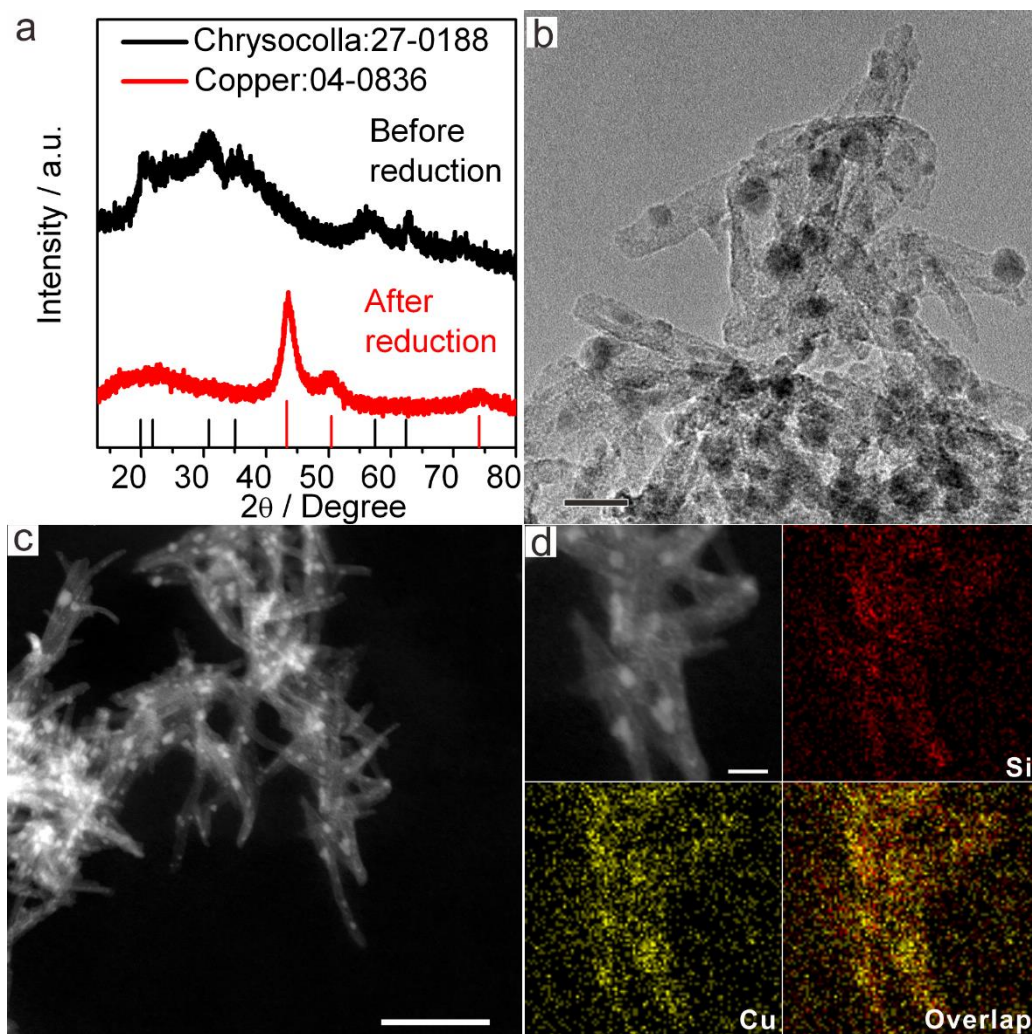

**Supplementary Figure 10.** Characterizations of Cu-PSNT. **a**, XRD patterns of copper phyllosilicate nanotubes (Cu-PSNT) before and after in situ reduction; **b**, TEM image of reduced Cu-PSNT; **c**, **d**, Representative high-angle annular-dark-field (HAADF) STEM image and EDX mapping images of reduced Cu-PSNT, respectively. Scale bars in **b**, **c** and **d** are 20nm, 100nm and 10nm, respectively.

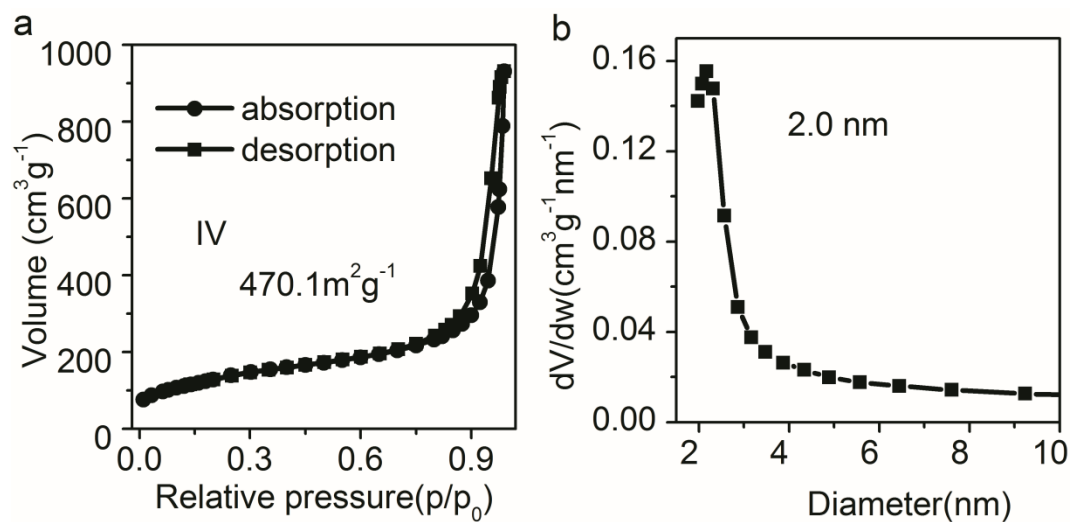

**Supplementary Figure 11.** Porosity measurements of reduced Cu-PSNT. **a**,  $N_2$  adsorption/desorption isotherm; **b**, the pore-size distribution curve obtained from the desorption data of reduced Cu-PSNT.

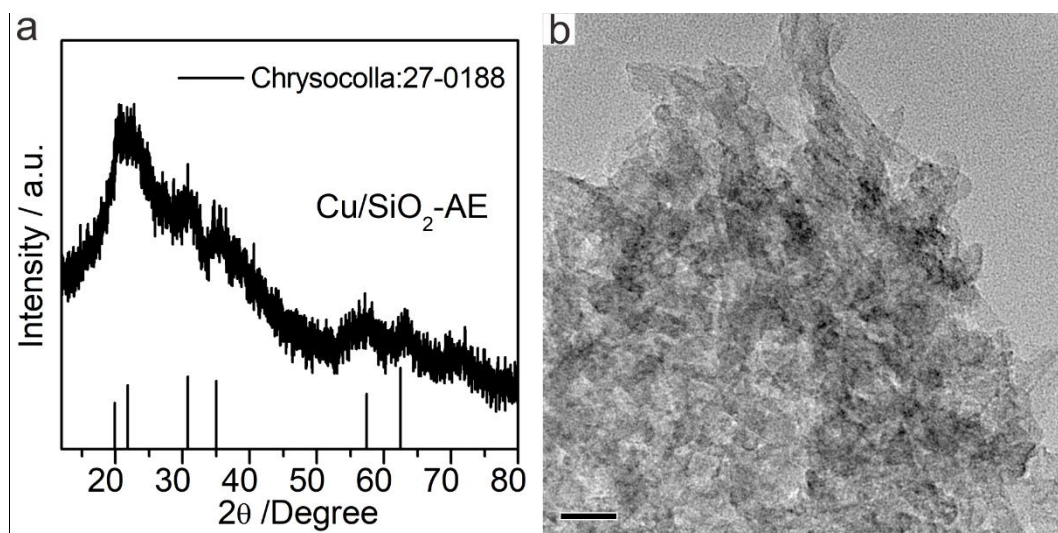

**Supplementary Figure 12.** Characterizations of Cu/SiO<sub>2</sub>-AE before catalysis. **a**, X-ray powder diffraction pattern; **b**, TEM image of as-prepared Cu/SiO<sub>2</sub>-AE (AE method). Scale bar in b is 20 nm.

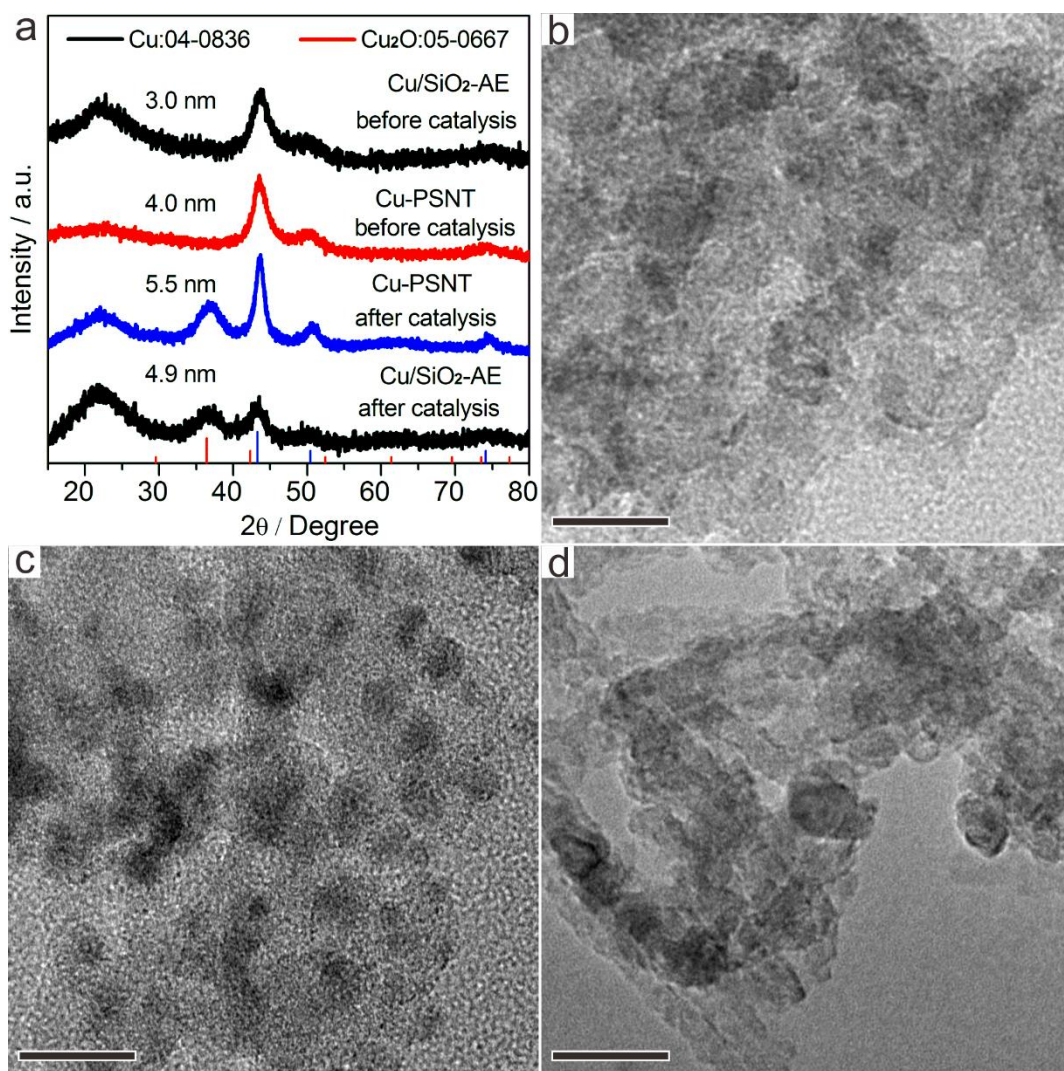

**Supplementary Figure 13.** Characterizations of Cu/SiO<sub>2</sub>-AE catalyst. **a**, X-ray powder diffraction patterns of copper-based catalysts before and after catalysis; **b-d**, TEM images of Cu/SiO<sub>2</sub>-AE before catalysis (reduced), Cu/SiO<sub>2</sub>-AE after catalysis and Cu-PSNT catalyst after catalysis, respectively. Scale bars are 20 nm for all panels b-d.

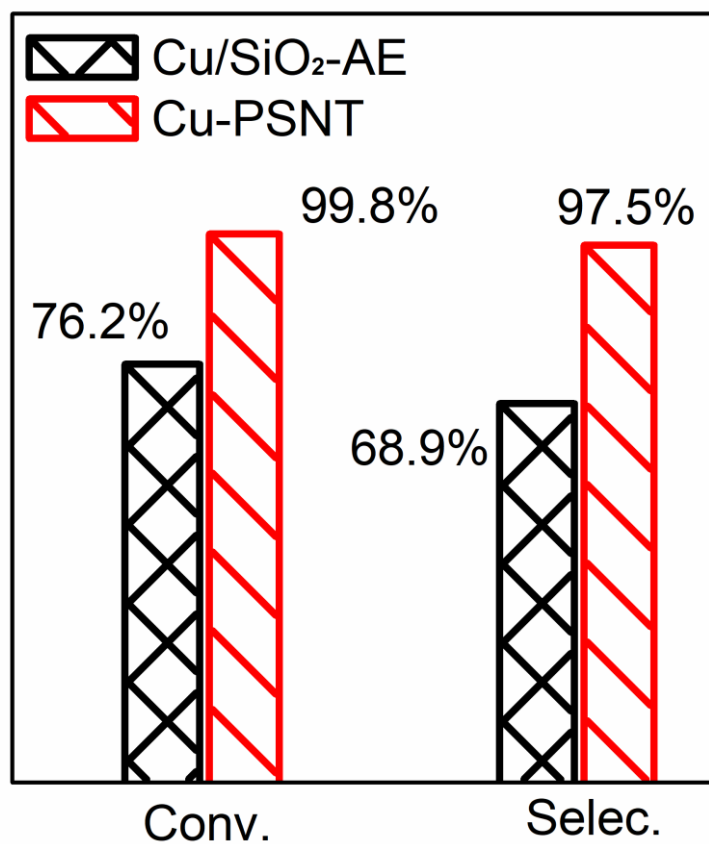

**Supplementary Figure 14.** Catalytic performance of catalysts. Reaction conditions were as follows:  $H_2 / DMO = 80 \text{ mol/mol}$ ,  $P (H_2) = 3.0 \text{ MPa}$ ,  $T = 200 \text{ }^\circ\text{C}$ ,  $LHSV = 4.2 \text{ h}^{-1}$ .

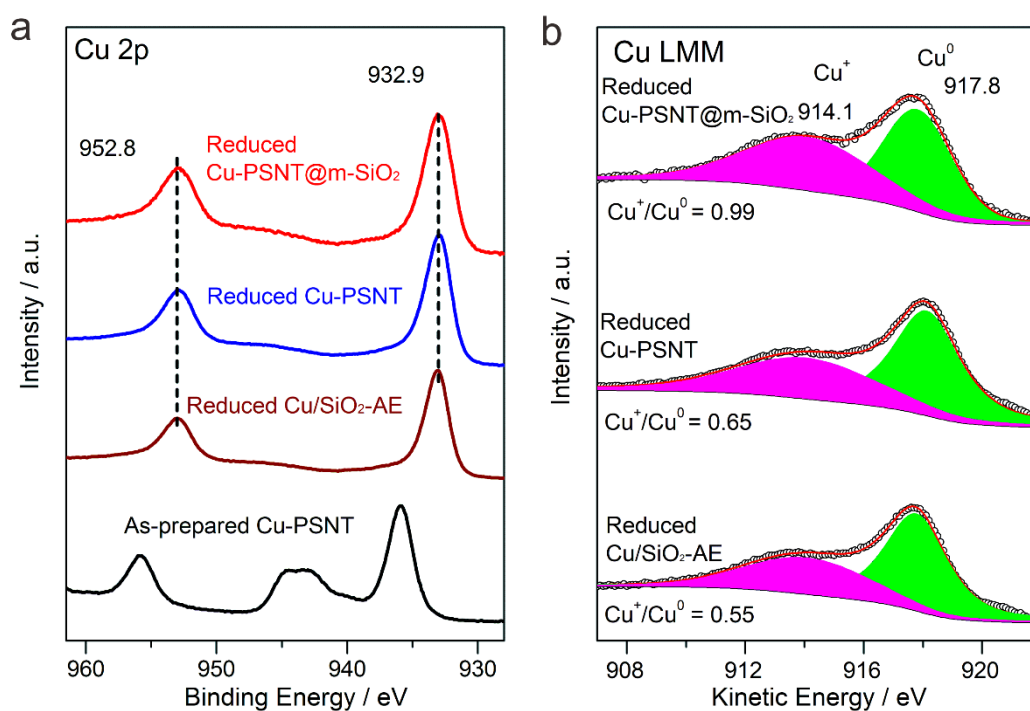

**Supplementary Figure 15.** The XPS characterizations of catalysts (*quasi-in-situ*). **a**, Cu 2p XPS of the reduced Cu/SiO<sub>2</sub>-AE, the reduced Cu-PSNT and the reduced Cu-PSNT@m-SiO<sub>2</sub>, respectively; **b**, Cu LMM XAES spectra of Cu-PSNT, the reduced Cu/SiO<sub>2</sub>-AE, the reduced Cu-PSNT and the reduced Cu-PSNT@m-SiO<sub>2</sub>, respectively.



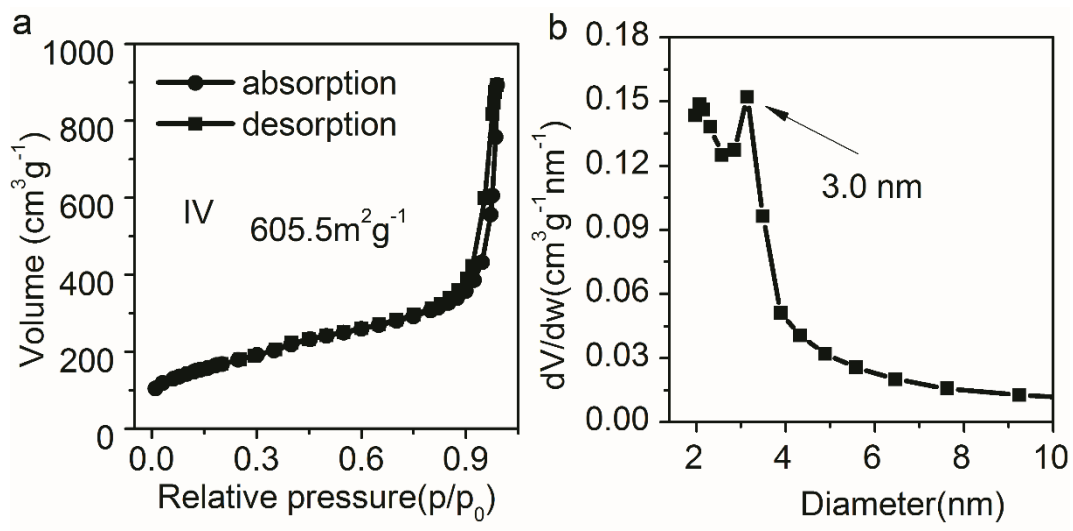

**Supplementary Figure 16.** Porosity measurements of Cu-PSNT@m-SiO<sub>2</sub>. **a**, N<sub>2</sub> adsorption/desorption isotherms; **b**, the pore-size distribution curve obtained from the desorption data of Cu-PSNT@m-SiO<sub>2</sub>.

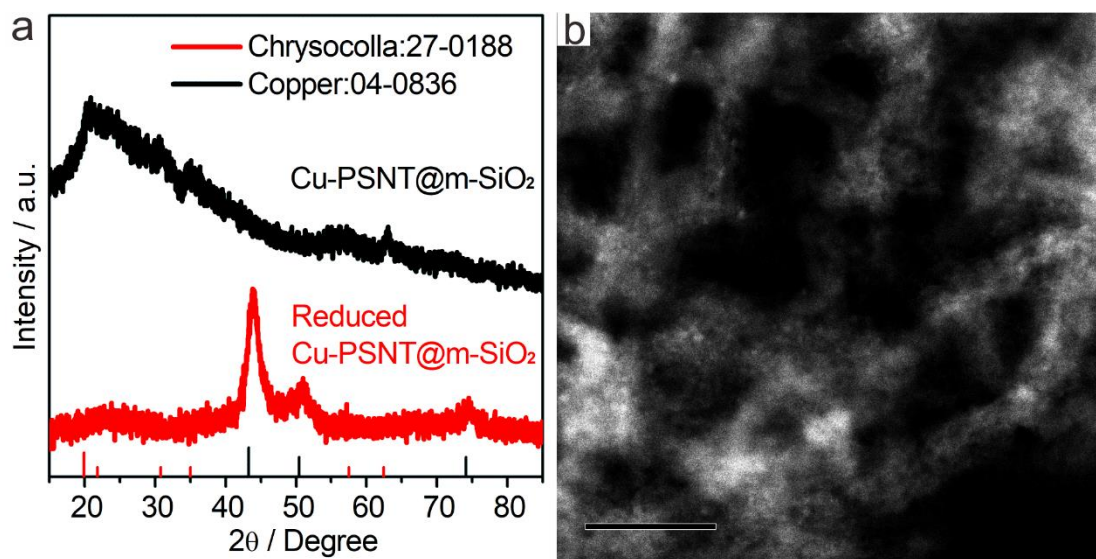

**Supplementary Figure 17.** Structure characterizations of Cu-PSNT@m-SiO<sub>2</sub>. **a**, X-ray powder diffraction patterns of Cu-PSNT@m-SiO<sub>2</sub> before and after in situ reduction; **b**, Representative high-angle annular-dark-field (HAADF) STEM image of the reduced Cu-PSNT@m-SiO<sub>2</sub>. Scale bar in b is 50 nm.

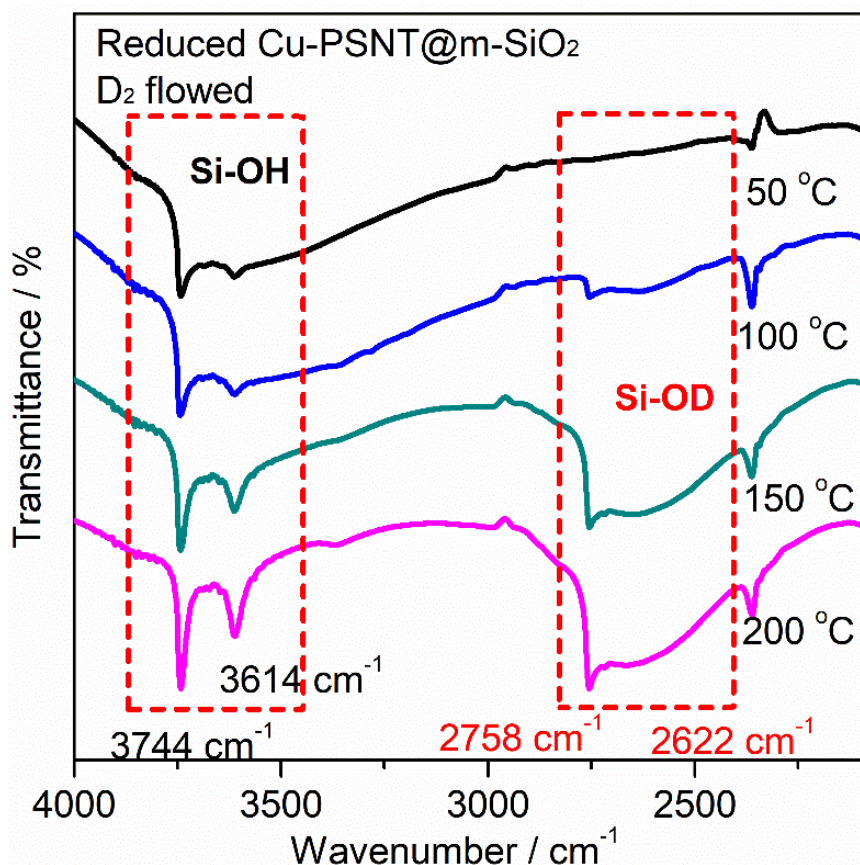

**Supplementary Figure 18.** In situ FT-IR measurement over the reduced Cu PSNT@m-SiO<sub>2</sub> catalyst and pristine SiO<sub>2</sub> under D<sub>2</sub> atmosphere. The in situ IR spectra were recorded on a Nicolet iS50 FT-IR spectrometer with diffuse reflection mode. In a typical testing, 25 mg of the catalyst was placed in an in-situ cell and reduced under a 5% H<sub>2</sub> + 95% N<sub>2</sub> flow (50 mL per min) at 573K (2 °C per min) for 4 h. After cooling the samples to room temperature, 5%H<sub>2</sub> + 95%N<sub>2</sub> flow was replaced with D<sub>2</sub> flow (50 mL per min) and then the catalyst was heated to 200 °C (5 °C per min) during the IR testing. At the beginning and before introducing D<sub>2</sub>, the as-prepared reduced Cu-PSNT@m-SiO<sub>2</sub> catalyst (prepared by reducing Cu-PSNT@m-SiO<sub>2</sub> under H<sub>2</sub> at 300 °C for 2h) only showed SiO-H with two  $\delta_{OH}$  bands of hydroxyl groups at 3744 cm<sup>-1</sup> and 3614 cm<sup>-1</sup> in FT-IR spectra, and no obvious SiO-D signal was observed<sup>1</sup>. After introducing D<sub>2</sub> and increasing the reaction temperature, SiO-D signal started to appear at 100 °C, with two  $\delta_{OH}$  bands at 2622 cm<sup>-1</sup> and 2758 cm<sup>-1</sup>, which indicating that the exchange of dissociated H and D at Cu-SiO<sub>2</sub> interface take place<sup>2</sup>. Increasing the reaction temperature would result in much stronger SiO-D signal indicating that the number of SiO-D groups was increased. It's worth to mention that Cu-H cannot be observed because IR peaks of both Cu-H and Cu-D appear at 1852 and 1336 cm<sup>-1</sup>, near to H<sub>2</sub>O (~1640 cm<sup>-1</sup>), and it is difficult to distinguish these three FT-IR signals<sup>3</sup>.

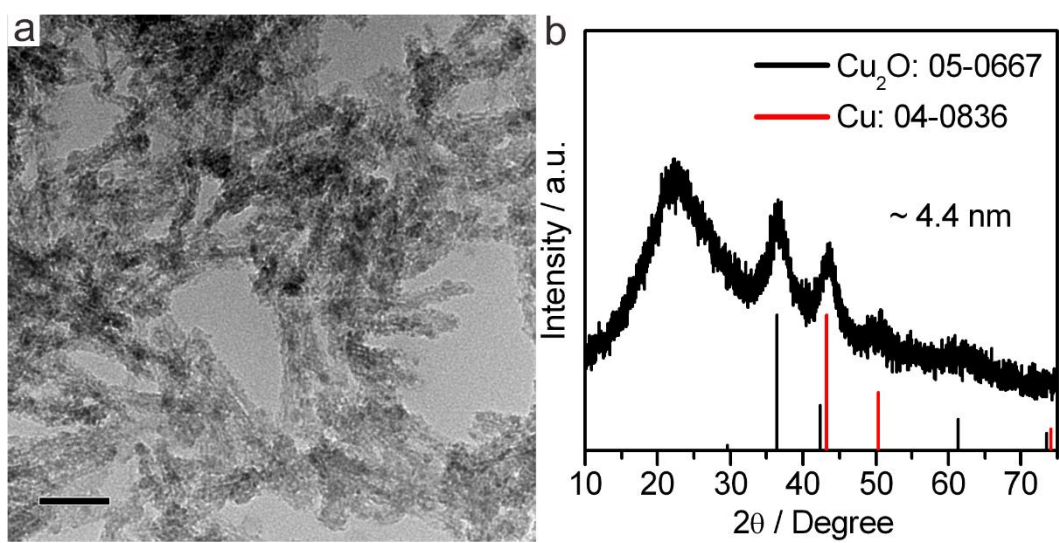

**Supplementary Figure 19.** Characterizations of Cu-PSNT@m-SiO<sub>2</sub> after catalysis. **a**, **b**, TEM image and X-ray powder diffraction pattern of the reduced Cu-PSNT@m-SiO<sub>2</sub> after LHSV-dependent catalysis test, respectively. Scale bar in a is 50 nm.

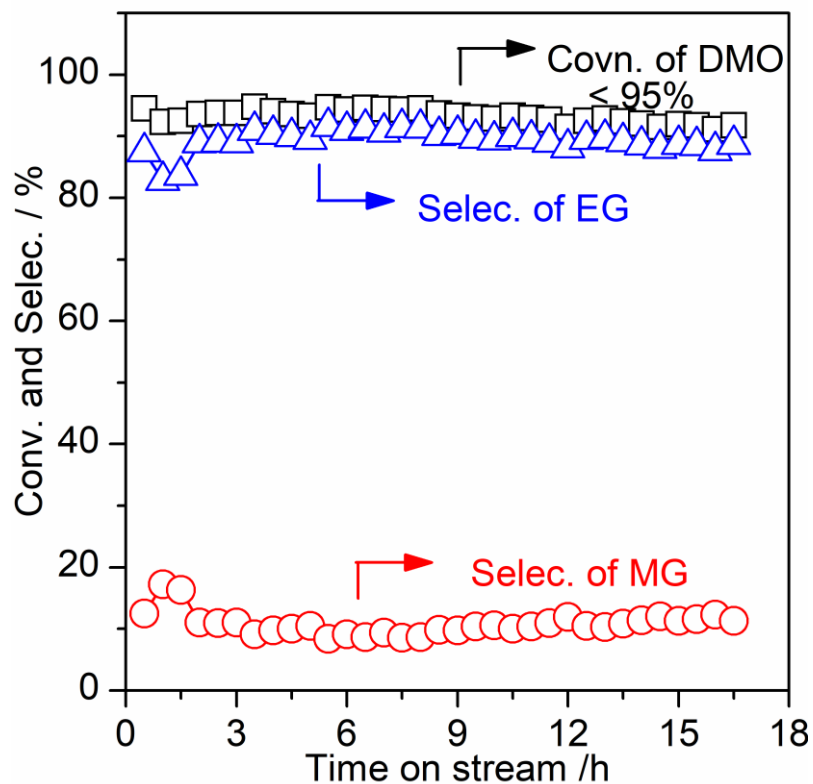

**Supplementary Figure 20.** Catalytic performance of reduced Cu-PSNT@m-SiO<sub>2</sub> catalyst. Reaction conditions were as follows: H<sub>2</sub> / DMO = 80 mol/mol,  $P$  (H<sub>2</sub>) = 3.0 MPa,  $T$  = 280 °C, LHSV = 300 h<sup>-1</sup>.

**Supplementary Table 1.** The XPS analysis of surface species.

| Catalyst                   | <sup>a</sup> K.E./EV |                 | B.E of<br>Cu 2p <sub>3/2</sub> | <sup>b</sup> Cu <sup>+</sup> /Cu <sup>0</sup> |
|----------------------------|----------------------|-----------------|--------------------------------|-----------------------------------------------|
|                            | Cu <sup>+</sup>      | Cu <sup>0</sup> |                                |                                               |
| Cu/SiO <sub>2</sub> -AE    | 914.1                | 917.8           | 933.0                          | 0.55                                          |
| Cu-PSNT                    | 914.0                | 918.1           | 932.9                          | 0.65                                          |
| Cu-PSNT@m-SiO <sub>2</sub> | 914.1                | 917.8           | 932.9                          | 0.99                                          |

<sup>a</sup> Kinetic energy

<sup>b</sup> Intensity ratio of Cu<sup>+</sup> to Cu<sup>0</sup> from the analysis of Cu XAES spectra

**Supplementary Table 2.** The TOF of the reduced Cu/SiO<sub>2</sub>-AE, the reduced Cu-PSNT and the reduced Cu-PSNT@m-SiO<sub>2</sub> catalysts.

| Catalyst                   | <sup>a</sup> Cu loading<br>(wt %) | <sup>b</sup> Cu dispersion<br>(%) | <sup>c</sup> TOF<br>(h <sup>-1</sup> ) |
|----------------------------|-----------------------------------|-----------------------------------|----------------------------------------|
| Cu/SiO <sub>2</sub> -AE    | 19.83                             | 54.45                             | 10.21                                  |
| Cu-PSNT                    | 30.95                             | 35.56                             | 23.08                                  |
| Cu-PSNT@m-SiO <sub>2</sub> | 20.47                             | 37.72                             | 40.62                                  |
|                            |                                   |                                   | <sup>d</sup> 6254                      |

<sup>a</sup> Determined by ICP-AES.

<sup>b</sup> The copper dispersions were determined by N<sub>2</sub>O titration.

<sup>c</sup> The turnover frequencies (TOF) indicated the moles of DMO converted per hour by per mol copper at the catalyst surface. Reaction condition: 473 K, 3.0 MPa, H<sub>2</sub>/DMO = 80

<sup>d</sup> Turnover frequency (TOF) was calculated as moles of EG form at LHSV = 4327 h<sup>-1</sup> in the initial 1h per mole of surface copper calculated from the copper dispersion. Reaction condition: 557 K, 2.5 MPa, H<sub>2</sub>/DMO = 200.

**Supplementary Table 3.** Catalytic performance of Cu-based catalysts for DMO hydrogenation

| Catalyst<br>(Cu loading wt %)        | LHSV<br>(h <sup>-1</sup> ) | P<br>(MPa) | H <sub>2</sub> /DMO<br>(mol/mol<br>) | T/K | Conv.<br>(%) | Sel.*/Yield <sup>#</sup><br>(%) |                   | Ref.               |
|--------------------------------------|----------------------------|------------|--------------------------------------|-----|--------------|---------------------------------|-------------------|--------------------|
|                                      |                            |            |                                      |     |              | EG*                             | EtOH <sup>#</sup> |                    |
| 20%Cu-MCM-41                         | 3.0                        | 2.5        | 80                                   | 473 | 100          | 95                              | /                 | Ref. <sup>4</sup>  |
| 20%Cu-MCM-41                         | 4.5                        | 2.5        | 80                                   | 473 | 96           | 39                              | /                 | Ref. <sup>4</sup>  |
| Cu/H1S1 (20.0)                       | 1.5                        | 2.5        | 100                                  | 473 | 100          | 98                              | /                 | Ref. <sup>5</sup>  |
| Cu/H1S1 (20.0)                       | 4.0                        | 2.5        | 100                                  | 473 | 100          | 67                              | /                 | Ref. <sup>5</sup>  |
| IE-333 (20.4)                        | 0.76                       | 2.5        | 100                                  | 473 | 100          | 75                              | /                 | Ref. <sup>6</sup>  |
| 20Cu/SiO <sub>2</sub> (19.2)         | 2.5                        | 2.5        | 200                                  | 553 | 100          | /                               | 83.0              | Ref. <sup>7</sup>  |
| Cu@CuPSNTs-in<br>(39.3)              | 2.0                        | 2.5        | 200                                  | 553 | 98.7         | /                               | 91.7              | Ref. <sup>8</sup>  |
| CuSi-363 (17.6)                      | 0.5                        | 2.5        | 50                                   | 473 | 80           | 42                              | /                 | Ref. <sup>9</sup>  |
| 1B-Cu-SiO <sub>2</sub> (27.0)        | 6.0                        | 3.0        | 80                                   | 463 | 61.9         | 39.4                            | /                 | Ref. <sup>10</sup> |
| Cu-PSNT@m-SiO <sub>2</sub><br>(20.5) | 3.0                        | 3.0        | 80                                   | 473 | 99.9         | 98.4                            | /                 | This<br>work       |
|                                      | 4.2                        | 3.0        | 80                                   | 473 | 99.9         | 98.7                            | /                 |                    |
|                                      | 7.8                        | 3.0        | 80                                   | 473 | 99.9         | 96.0                            | /                 |                    |
|                                      | 100                        | 2.5        | 80                                   | 553 | 99.78        | 92.3                            | 0.19              |                    |
|                                      | 100                        | 2.5        | 100                                  | 553 | 98.5         | 90.6                            | 0.35              |                    |
|                                      | 250                        | 2.5        | 200                                  | 553 | 95.6         | 86.2                            | 0.19              |                    |



## Supplementary References

- 1 Mawhinney, D. B., Glass, J. A. & Yates, J. T. FTIR Study of the Oxidation of Porous Silicon. *The J. Phys. Chem. B* **101**, 1202-1206, (1997).
- 2 Gupta, P., Dillon, A., Bracker, A. & George, S. FTIR studies of H<sub>2</sub>O and D<sub>2</sub>O decomposition on porous silicon surfaces. *Surf. Sci.* **245**, 360-372, (1991).
- 3 Ozin, G. A., Mitchell, S. A. & Prieto, J. G. Cu-H<sub>2</sub> Photochemistry in the Matrix; ESR, FTIR, UV/VIS Spectroscopic and Kinetic Studies. *Angew. Chem. Int. Ed.* **21**, 380-381, (1982).
- 4 Ma, X. *et al.* Hydrogenation of dimethyl oxalate to ethylene glycol over mesoporous Cu-MCM-41 catalysts. *AIChE J.* **59**, 2530-2539, (2013).
- 5 Yin, A. Y., Wen, C. O., Dai, W. L. & Fan, K. N. A. Surface modification of HMS material with silica sol leading to a remarkable enhanced catalytic performance of Cu/SiO<sub>2</sub>. *Appl. Surf. Sci.* **257**, 5844-5849, (2011).
- 6 Yin, A., Guo, X., Fan, K. & Dai, W.-L. Ion-Exchange Temperature Effect on Cu/HMS Catalysts for the Hydrogenation of Dimethyl Oxalate to Ethylene Glycol. *ChemCatChem* **2**, 206-213, (2010).
- 7 Gong, J. *et al.* Synthesis of Ethanol via Syngas on Cu/SiO<sub>2</sub> Catalysts with Balanced Cu<sup>0</sup>-Cu<sup>+</sup> Sites. *J. Am. Chem. Soc.* **134**, 13922-13925, (2012).
- 8 Yue, H. *et al.* A copper-phyllsilicate core-sheath nanoreactor for carbon–oxygen hydrogenolysis reactions. *Nat. Commun.* **4**, (2013).
- 9 Chen, L. *et al.* Cu/SiO<sub>2</sub> catalysts prepared by the ammonia-evaporation method: Texture, structure, and catalytic performance in hydrogenation of dimethyl oxalate to ethylene glycol. *J. Catal.* **257**, 172-180, (2008).
- 10 He, Z., Lin, H., He, P. & Yuan, Y. Effect of boric oxide doping on the stability and activity of a Cu-SiO<sub>2</sub> catalyst for vapor-phase hydrogenation of dimethyl oxalate to ethylene glycol. *J. Catal.* **277**, 54-63, (2011).
